# Supplementary material
Source: HighWire-hosted journal article supplement (https://www.life-science-alliance.org/content/6/5/e202201702/F1)

Figure 1B

Body weight change

|           |   | Days after DSS |           |           |           |           |
|-----------|---|----------------|-----------|-----------|-----------|-----------|
|           | 0 | 1              | 1         | 1         | 1         | 1         |
| DSS       | 1 | 1.0211004      | 1.0267211 | 1.0081301 | 1.0124707 | 1.0058404 |
|           | 2 | 1.0215409      | 1.0091703 | 1.004065  | 1.0042392 | 1.0180078 |
|           | 3 | 1.0219814      | 1.0025887 | 0.995935  | 1.0165864 | 1.0078683 |
|           | 4 | 1.0867363      | 0.9960072 | 1.0191057 | 1.0083549 | 0.9283744 |
|           | 5 | 0.9510594      | 0.9595893 | 0.9272358 | 0.9215129 | 0.9263465 |
|           | 6 | 0.8603145      | 0.9341407 | 0.8865854 | 0.8474297 | 0.8671317 |
|           | 7 | 0.8796969      | 0.8485806 | 0.7882114 | 0.8042145 | 0.7174724 |
|           | 0 | 1              | 1         | 1         | 1         | 1         |
| TA10+DSS  | 1 | 0.9885313      | 0.97593   | 0.988644  | 1.0073006 | 1.0110097 |
|           | 2 | 1.0142075      | 1.0021882 | 1.002004  | 1.0165419 | 1.0392837 |
|           | 3 | 1.0142075      | 0.9964989 | 0.9663772 | 1.0165419 | 1.0144369 |
|           | 4 | 0.9513009      | 0.9964989 | 1.000668  | 1.0156178 | 1.0264319 |
|           | 5 | 0.9149264      | 0.9763676 | 0.9832999 | 0.981425  | 0.9968727 |
|           | 6 | 0.8824033      | 0.9304158 | 0.9873079 | 0.9657148 | 0.977595  |
|           | 7 | 0.8584389      | 0.8800875 | 0.8911156 | 1.0151557 | 0.852504  |
|           | 0 | 1              | 1         | 1         | 1         | 1         |
| TA50+DSS  | 1 | 0.9979577      | 0.973236  | 1.0049186 | 1.0502049 | 1.0199843 |
|           | 2 | 1.021166       | 0.9820836 | 1.0261194 | 1.0911885 | 1.0522915 |
|           | 3 | 1.0025993      | 0.9688122 | 1.0176391 | 1.1065574 | 1.0338302 |
|           | 4 | 0.9951727      | 0.9480203 | 1.0023745 | 1.0901639 | 0.9844464 |
|           | 5 | 0.9269402      | 0.89405   | 1.0125509 | 1.0881148 | 1.0739835 |
|           | 6 | 0.9023394      | 0.9006857 | 1.0341757 | 1.0553279 | 0.9678313 |
|           | 7 | 0.968251       | 0.8843176 | 0.9040027 | 1.1434426 | 0.9576776 |
|           | 0 | 1              | 1         | 1         | 1         | 1         |
| TA250+DSS | 1 | 1.0123735      | 1.0337667 | 0.961786  | 1.0081178 | 1.021388  |
|           | 2 | 1.0033746      | 1.0157096 | 0.9808708 | 1.0128375 | 0.9559144 |
|           | 3 | 1.0096738      | 1.0278982 | 0.991079  | 1.0218048 | 0.9943256 |
|           | 4 | 0.9898763      | 1.0089382 | 0.9839776 | 1.0567302 | 0.9620253 |
|           | 5 | 0.9687171      | 0.9498761 | 0.9738112 | 0.9666194 | 0.842284  |
|           | 6 | 0.9462138      | 0.9455487 | 0.8662602 | 0.9334486 | 0.8744322 |
|           | 7 | 0.8254437      | 0.8891677 | 0.8442377 | 0.9047779 | 0.849068  |
|           | 0 | 1              | 1         | 1         | 1         | 1         |

Figure 1C

Colon length (cm)

|               |  | DSS day3 |     |     |     |     |
|---------------|--|----------|-----|-----|-----|-----|
| Mice number   |  | 1        | 2   | 3   | 4   | 5   |
| DSS3d         |  | 9        | 9.6 | 8.7 | 9.1 | 9.9 |
| Pre-10TA+DSS  |  | 9.5      | 10  | 9.4 | 8.9 | 9.5 |
| Pre-50TA+DSS  |  | 9.8      | 9.5 | 9.9 | 9.1 | 9   |
| Pre-250TA+DSS |  | 9.9      | 9.4 | 9.2 | 10  | 9.3 |
|               |  | DSS day7 |     |     |     |     |
| Mice number   |  | 1        | 2   | 3   | 4   | 5   |
| DSS7d         |  | 6        | 6.2 | 5.2 | 5.6 | 6.5 |
| Pre-10TA+DSS  |  | 6.8      | 6.5 | 7.2 | 6.9 | 7.4 |
| Pre-50TA+DSS  |  | 7.4      | 7.5 | 8.6 | 8.3 | 7   |
| Pre-250TA+DSS |  | 7.1      | 6.5 | 7.2 | 6.7 | 6.9 |

Figure 1D

Histological score

|       |           | Mouse NO. |   |   |   |   |
|-------|-----------|-----------|---|---|---|---|
|       |           | 1         | 2 | 3 | 4 | 5 |
| Day 3 | DSS       | 0         | 0 | 1 | 0 | 0 |
|       | TA10+DSS  | 0         | 1 | 1 | 0 | 0 |
|       | TA50+DSS  | 0         | 0 | 0 | 1 | 0 |
|       | TA250+DSS | 2         | 1 | 3 | 3 | 2 |
| Day 7 | DSS       | 6         | 5 | 6 | 6 | 5 |
|       | TA10+DSS  | 5         | 5 | 4 | 3 | 4 |
|       | TA50+DSS  | 1         | 2 | 2 | 1 | 3 |
|       | TA250+DSS | 6         | 6 | 6 | 6 | 5 |

Figure 1E

|          |          | Fold of change<br>relative to GAPDH |          |          |          |          |
|----------|----------|-------------------------------------|----------|----------|----------|----------|
| IL-1beta | DSS      | 2.099433                            | 2.099433 | 0.846745 | 0.790041 | 0.707107 |
|          | TA50+DSS | 0.779165                            | 0.205898 | 0.239816 | 0.366021 | 0.48971  |
| IL-6     | DSS      | 1.853176                            | 1.931873 | 1.180993 | 0.926588 | 0.482968 |
|          | TA50+DSS | 0.146604                            | 0.04095  | 0.036147 | 0.15283  | 0.185565 |
| TNF-a    | DSS      | 1.134455                            | 1.241427 | 0.802181 | 1.001387 | 1.001387 |
|          | TA50+DSS | 0.743291                            | 0.75891  | 0.883928 | 0.934327 | 0.791137 |
| Cxcl1    | DSS      | 1.837826                            | 1.19582  | 0.833931 | 0.725979 | 0.751581 |
|          | TA50+DSS | 0.573554                            | 0.602069 | 0.327145 | 0.36299  | 0.370617 |
| Cxcl2    | DSS      | 1.306765                            | 1.004168 | 1.039579 | 0.936921 | 0.782412 |
|          | TA50+DSS | 0.462011                            | 0.462011 | 0.391206 | 0.357496 | 0.247586 |

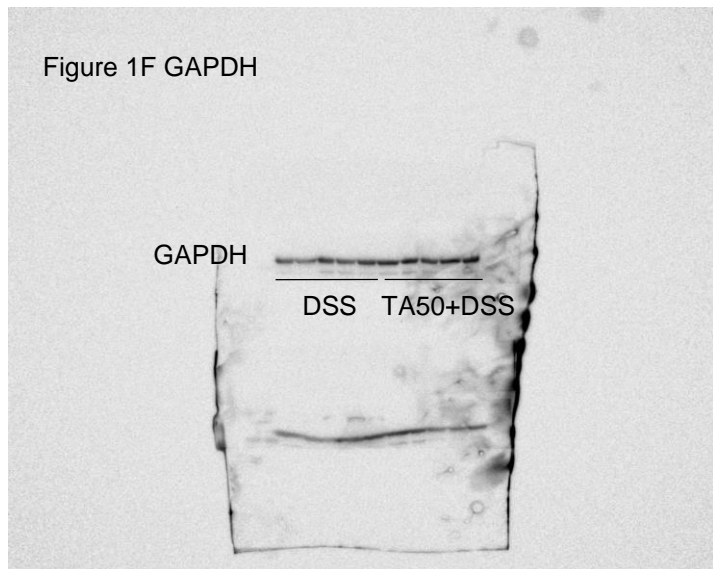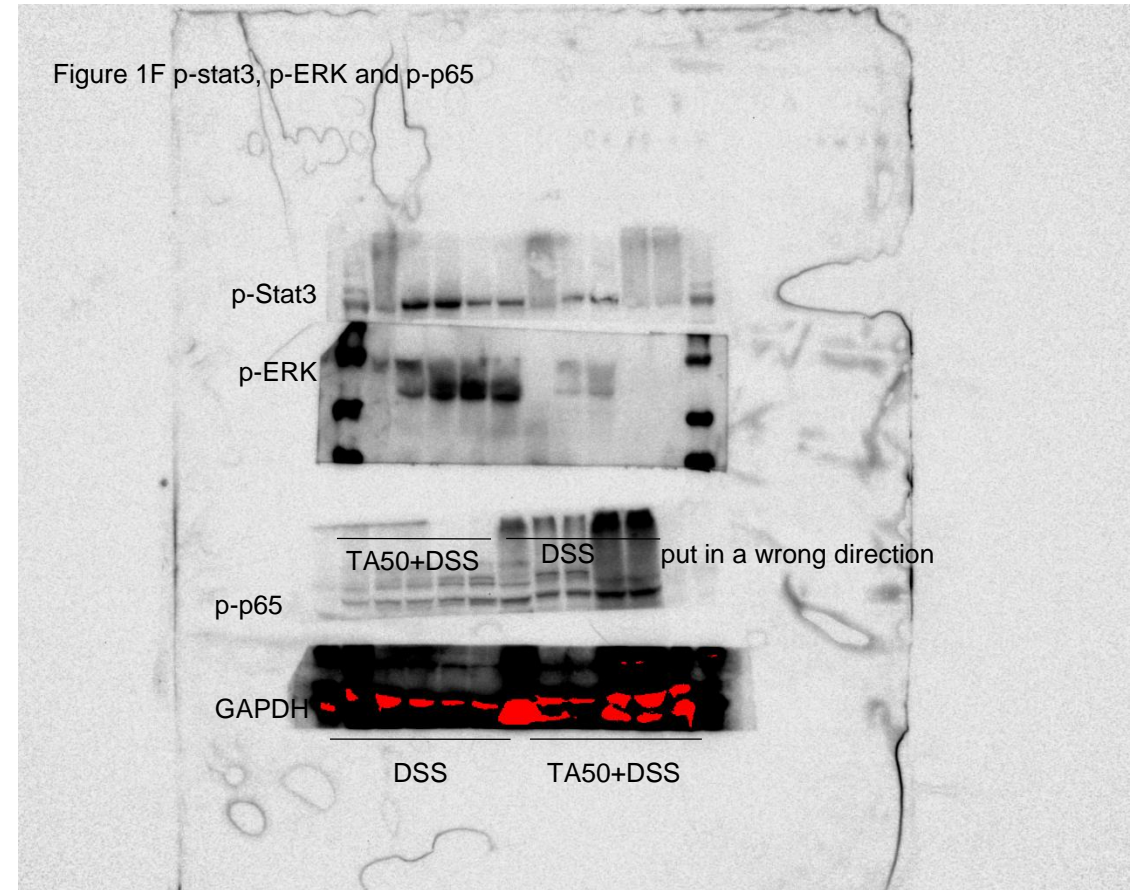

Supplement: inline-supplementary-material-1 [file inline-supplementary-material-1.pdf]
